# Supplementary material for: Discovering Genetic Interactions in Large-Scale Association Studies by Stage-wise Likelihood Ratio Tests
Source: PubMed Central journal article supplement (PMC4581725; doi:10.1371/journal.pgen.1005502), 2015-09-24
Supplement: pgen.1005502.s012.pdf [file pgen.1005502.s012.pdf]

| <b>SNP</b> | <b>Chromosome</b> | <b>Position</b> | <b>Locus</b>           |
|------------|-------------------|-----------------|------------------------|
| rs11206510 | 1                 | 55268627        | PCSK9                  |
| rs646776   | 1                 | 109620053       | CELSR2                 |
| rs3008621  | 1                 | 220870669       | MIA3                   |
| rs17465637 | 1                 | 220890152       | MIA3                   |
| rs4299376  | 2                 | 43926080        | ABCG8                  |
| rs2706399  | 5                 | 131895601       | IL5                    |
| rs3798220  | 6                 | 160881127       | LPA                    |
| rs10455872 | 6                 | 160930108       | LPA                    |
| rs11556924 | 7                 | 129450732       | ZC3HC1                 |
| rs17321515 | 8                 | 126555591       | TRIB1                  |
| rs4977574  | 9                 | 22088574        | CDKN2B-AS1             |
| rs1333049  | 9                 | 22115503        | CDKN2B-AS1             |
| rs501120   | 10                | 44073873        | LINC00841,LOC100130539 |
| rs2246942  | 10                | 90994866        | LIPA                   |
| rs3824755  | 10                | 104585839       | CYP17A1                |
| rs3184504  | 12                | 110368991       | SH2B3                  |
| rs4773144  | 13                | 109758713       | COL4A2                 |
| rs46522    | 17                | 44343596        | UBE2Z                  |
