# Supplementary material for: Discovering Genetic Interactions in Large-Scale Association Studies by Stage-wise Likelihood Ratio Tests
Source: PubMed Central journal article supplement (PMC4581725; doi:10.1371/journal.pgen.1005502), 2015-09-24
Supplement: pgen.1005502.s013.pdf [file pgen.1005502.s013.pdf]

| <b>All vs all strategy</b>      |           | Main effects |           |           |            |            | Interaction   |               |               |               |       |
|---------------------------------|-----------|--------------|-----------|-----------|------------|------------|---------------|---------------|---------------|---------------|-------|
| SNP 1                           | SNP 2     | $\alpha$     | $\beta_1$ | $\beta_2$ | $\gamma_1$ | $\gamma_2$ | $\delta_{11}$ | $\delta_{12}$ | $\delta_{21}$ | $\delta_{22}$ | LR    |
| rs3917245                       | rs1412832 | 0.2298       | -0.3541   | -0.6515   | -0.4278    | -0.4339    | 0.4718        | 0.1768        | 0.4384        | -0.243        | 20.08 |
| rs4846770                       | rs518394  | 0.02662      | 0.03054   | 0.2357    | 0.1205     | -0.2512    | -0.3603       | -0.3069       | -0.8407       | -0.1624       | 23.27 |
| rs17163313                      | rs518394  | 0.03001      | 0.02525   | 0.2255    | 0.1128     | -0.2575    | -0.3549       | -0.312        | -0.8194       | -0.1316       | 22.71 |
| rs17163313                      | rs2069418 | 0.0305       | 0.06223   | 0.2004    | 0.1108     | -0.2543    | -0.4204       | -0.3259       | -0.7402       | -0.1719       | 21.78 |
| rs2378584                       | rs518394  | 0.02822      | 0.02932   | 0.2245    | 0.116      | -0.2557    | -0.3564       | -0.305        | -0.8197       | -0.1483       | 22.47 |
| rs4846770                       | rs2069418 | 0.02523      | 0.06923   | 0.2132    | 0.1217     | -0.2463    | -0.4268       | -0.3233       | -0.7656       | -0.2034       | 22.54 |
| rs17163301                      | rs518394  | 0.02822      | 0.02932   | 0.2245    | 0.116      | -0.2557    | -0.3597       | -0.2995       | -0.8197       | -0.1483       | 22.48 |
| <b>CAD loci vs all strategy</b> |           | Main effects |           |           |            |            | Interaction   |               |               |               |       |
| SNP 1                           | SNP 2     | $\alpha$     | $\beta_1$ | $\beta_2$ | $\gamma_1$ | $\gamma_2$ | $\delta_{11}$ | $\delta_{12}$ | $\delta_{21}$ | $\delta_{22}$ | LR    |
| rs17465637                      | rs518394  | 0.01704      | 0.06282   | 0.2194    | 0.102      | -0.2416    | -0.3444       | -0.3103       | -0.807        | -0.2949       | 19.63 |
| <b>HumanNet strategy</b>        |           | Main effects |           |           |            |            | Interaction   |               |               |               |       |
| SNP 1                           | SNP 2     | $\alpha$     | $\beta_1$ | $\beta_2$ | $\gamma_1$ | $\gamma_2$ | $\delta_{11}$ | $\delta_{12}$ | $\delta_{21}$ | $\delta_{22}$ | LR    |
| rs4694178                       | rs583104  | -0.0111      | 0.1079    | -0.01846  | -0.2479    | 0.2562     | -0.05035      | -1.285        | 0.2311        | -1.05         | 23.77 |
| rs4694178                       | rs602633  | -0.01696     | 0.121     | -0.004492 | -0.2484    | 0.3354     | -0.09983      | -1.379        | 0.2113        | -1.217        | 25.98 |
