# Supplementary material for: Discovering Genetic Interactions in Large-Scale Association Studies by Stage-wise Likelihood Ratio Tests
Source: PubMed Central journal article supplement (PMC4581725; doi:10.1371/journal.pgen.1005502), 2015-09-24
Supplement: pgen.1005502.s014.pdf [file pgen.1005502.s014.pdf]

| <b>All vs all strategy</b>      |           | Main effects |           |           |            |            | Interaction   |               |               |               |       |
|---------------------------------|-----------|--------------|-----------|-----------|------------|------------|---------------|---------------|---------------|---------------|-------|
| SNP 1                           | SNP 2     | $\alpha$     | $\beta_1$ | $\beta_2$ | $\gamma_1$ | $\gamma_2$ | $\delta_{11}$ | $\delta_{12}$ | $\delta_{21}$ | $\delta_{22}$ | LR    |
| rs3917245                       | rs1412832 | -2.034       | -0.3034   | -0.7309   | -0.4216    | -0.469     | 0.4372        | 0.1782        | 0.6209        | 0.02367       | 15.19 |
| rs4846770                       | rs518394  | -2.225       | 0.01927   | 0.1741    | 0.09202    | -0.2434    | -0.2973       | -0.2748       | -0.7592       | -0.08044      | 15.24 |
| rs17163313                      | rs518394  | -2.229       | 0.01386   | 0.1651    | 0.08441    | -0.2509    | -0.2936       | -0.2738       | -0.7272       | -0.06035      | 14.41 |
| rs17163313                      | rs2069418 | -2.226       | 0.05987   | 0.1264    | 0.1091     | -0.2537    | -0.3779       | -0.2891       | -0.6341       | -0.07263      | 13.93 |
| rs2378584                       | rs518394  | -2.228       | 0.01937   | 0.1589    | 0.08839    | -0.2487    | -0.297        | -0.276        | -0.7229       | -0.06119      | 14.4  |
| rs4846770                       | rs2069418 | -2.223       | 0.0644    | 0.1379    | 0.1189     | -0.2451    | -0.3793       | -0.2897       | -0.6696       | -0.09414      | 14.62 |
| rs17163301                      | rs518394  | -2.228       | 0.0194    | 0.1587    | 0.0886     | -0.2483    | -0.3          | -0.2667       | -0.7227       | -0.06135      | 14.32 |
| <b>CAD loci vs all strategy</b> |           | Main effects |           |           |            |            | Interaction   |               |               |               |       |
| SNP 1                           | SNP 2     | $\alpha$     | $\beta_1$ | $\beta_2$ | $\gamma_1$ | $\gamma_2$ | $\delta_{11}$ | $\delta_{12}$ | $\delta_{21}$ | $\delta_{22}$ | LR    |
| rs17465637                      | rs518394  | -2.258       | 0.06602   | 0.1875    | 0.08817    | -0.2203    | -0.3045       | -0.289        | -0.769        | -0.3028       | 13.42 |
| <b>HumanNet strategy</b>        |           | Main effects |           |           |            |            | Interaction   |               |               |               |       |
| SNP 1                           | SNP 2     | $\alpha$     | $\beta_1$ | $\beta_2$ | $\gamma_1$ | $\gamma_2$ | $\delta_{11}$ | $\delta_{12}$ | $\delta_{21}$ | $\delta_{22}$ | LR    |
| rs4694178                       | rs583104  | -2.327       | 0.1504    | 0.03143   | -0.2108    | 0.3941     | -0.1118       | -1.37         | 0.1728        | -1.305        | 21.86 |
| rs4694178                       | rs602633  | -2.33        | 0.1646    | 0.05609   | -0.1859    | 0.5106     | -0.1643       | -1.495        | 0.1006        | -1.367        | 22.46 |
