# Supplementary material for: Discovering Genetic Interactions in Large-Scale Association Studies by Stage-wise Likelihood Ratio Tests
Source: PubMed Central journal article supplement (PMC4581725; doi:10.1371/journal.pgen.1005502), 2015-09-24
Supplement: pgen.1005502.s015.pdf [file pgen.1005502.s015.pdf]

|              |              |              |              | <b>Discovery</b> |          |          |          |          |          |          |          |          |
|--------------|--------------|--------------|--------------|------------------|----------|----------|----------|----------|----------|----------|----------|----------|
| <b>SNP 1</b> | <b>SNP 2</b> | <b>MAF 1</b> | <b>MAF 2</b> | $n_{00}$         | $n_{01}$ | $n_{02}$ | $n_{10}$ | $n_{11}$ | $n_{12}$ | $n_{20}$ | $n_{21}$ | $n_{22}$ |
| rs4846770    | rs518394     | 0.283        | 0.423        | 1127             | 1580     | 626      | 910      | 1219     | 485      | 184      | 240      | 106      |
| rs17163313   | rs518394     | 0.282        | 0.423        | 1133             | 1585     | 627      | 905      | 1213     | 481      | 181      | 239      | 105      |
| rs3917245    | rs1412832    | 0.226        | 0.293        | 1967             | 1571     | 354      | 1160     | 923      | 207      | 154      | 148      | 28       |
| rs17163313   | rs2069418    | 0.282        | 0.431        | 1115             | 1588     | 664      | 885      | 1222     | 502      | 174      | 239      | 113      |
| rs2378584    | rs518394     | 0.282        | 0.423        | 1134             | 1584     | 627      | 904      | 1217     | 483      | 183      | 239      | 106      |
| rs4846770    | rs2069418    | 0.283        | 0.431        | 1110             | 1582     | 663      | 890      | 1229     | 506      | 177      | 240      | 114      |
| rs17163301   | rs518394     | 0.282        | 0.423        | 1134             | 1584     | 627      | 904      | 1217     | 484      | 183      | 239      | 106      |
| rs4694178    | rs583104     | 0.449        | 0.204        | 1261             | 629      | 82       | 2047     | 1056     | 131      | 812      | 432      | 59       |
| rs4694178    | rs602633     | 0.449        | 0.192        | 1297             | 599      | 76       | 2116     | 988      | 121      | 839      | 410      | 52       |
| rs17465637   | rs518394     | 0.271        | 0.423        | 1174             | 1631     | 644      | 877      | 1184     | 479      | 170      | 226      | 94       |

|              |              |              |              | <b>Replication</b> |          |          |          |          |          |          |          |          |
|--------------|--------------|--------------|--------------|--------------------|----------|----------|----------|----------|----------|----------|----------|----------|
| <b>SNP 1</b> | <b>SNP 2</b> | <b>MAF 1</b> | <b>MAF 2</b> | $n_{00}$           | $n_{01}$ | $n_{02}$ | $n_{10}$ | $n_{11}$ | $n_{12}$ | $n_{20}$ | $n_{21}$ | $n_{22}$ |
| rs4694178    | rs602633     | 0.485        | 0.153        | 1115               | 246      | 98       | 760      | 309      | 47       | 1066     | 182      | 91       |
