# Supplementary material for: Discovering Genetic Interactions in Large-Scale Association Studies by Stage-wise Likelihood Ratio Tests
Source: PubMed Central journal article supplement (PMC4581725; doi:10.1371/journal.pgen.1005502), 2015-09-24
Supplement: pgen.1005502.s016.pdf [file pgen.1005502.s016.pdf]

| Weights |       |       |       | Power          |              |
|---------|-------|-------|-------|----------------|--------------|
| $w_1$   | $w_2$ | $w_3$ | $w_4$ | Power adaptive | Power static |
| 0.2     | 0.1   | 0.5   | 0.2   | 0.691          | 0.597        |
| 0.3     | 0.2   | 0.1   | 0.4   | 0.696          | 0.621        |
| 0.1     | 0.4   | 0.3   | 0.2   | 0.729          | 0.631        |
| 0.1     | 0.4   | 0.4   | 0.1   | 0.703          | 0.633        |
| 0.2     | 0.5   | 0.1   | 0.2   | 0.730          | 0.633        |
| 0.1     | 0.6   | 0.1   | 0.2   | 0.711          | 0.635        |
| 0.1     | 0.4   | 0.1   | 0.4   | 0.727          | 0.639        |
| 0.5     | 0.1   | 0.3   | 0.1   | 0.716          | 0.639        |
| 0.1     | 0.7   | 0.1   | 0.1   | 0.709          | 0.640        |
| 0.4     | 0.1   | 0.3   | 0.2   | 0.717          | 0.640        |
| 0.2     | 0.2   | 0.5   | 0.1   | 0.730          | 0.640        |
| 0.1     | 0.1   | 0.3   | 0.5   | 0.724          | 0.640        |
| 0.2     | 0.2   | 0.4   | 0.2   | 0.733          | 0.643        |
| 0.4     | 0.3   | 0.1   | 0.2   | 0.728          | 0.643        |
| 0.2     | 0.3   | 0.3   | 0.2   | 0.727          | 0.645        |
| 0.3     | 0.2   | 0.4   | 0.1   | 0.716          | 0.646        |
| 0.2     | 0.1   | 0.3   | 0.4   | 0.722          | 0.646        |
| 0.1     | 0.2   | 0.6   | 0.1   | 0.691          | 0.646        |
| 0.2     | 0.6   | 0.1   | 0.1   | 0.708          | 0.648        |
| 0.1     | 0.3   | 0.4   | 0.2   | 0.721          | 0.649        |
| 0.5     | 0.1   | 0.1   | 0.3   | 0.723          | 0.649        |
| 0.3     | 0.1   | 0.5   | 0.1   | 0.736          | 0.650        |
| 0.4     | 0.2   | 0.1   | 0.3   | 0.727          | 0.650        |
| 0.2     | 0.3   | 0.4   | 0.1   | 0.729          | 0.651        |
| 0.1     | 0.3   | 0.1   | 0.5   | 0.751          | 0.652        |
| 0.1     | 0.2   | 0.3   | 0.4   | 0.737          | 0.654        |
| 0.1     | 0.1   | 0.2   | 0.6   | 0.752          | 0.654        |
| 0.1     | 0.4   | 0.2   | 0.3   | 0.734          | 0.654        |
| 0.3     | 0.5   | 0.1   | 0.1   | 0.738          | 0.654        |
| 0.25    | 0.25  | 0.25  | 0.25  | 0.722          | 0.656        |
| 0.3     | 0.4   | 0.1   | 0.2   | 0.730          | 0.660        |
| 0.3     | 0.4   | 0.2   | 0.1   | 0.732          | 0.660        |
| 0.6     | 0.1   | 0.2   | 0.1   | 0.726          | 0.660        |
| 0.4     | 0.1   | 0.4   | 0.1   | 0.727          | 0.661        |
| 0.4     | 0.4   | 0.1   | 0.1   | 0.738          | 0.662        |
| 0.1     | 0.2   | 0.4   | 0.3   | 0.730          | 0.662        |
| 0.3     | 0.3   | 0.3   | 0.1   | 0.713          | 0.663        |
| 0.1     | 0.1   | 0.6   | 0.2   | 0.750          | 0.663        |
| 0.1     | 0.5   | 0.1   | 0.3   | 0.766          | 0.664        |
| 0.1     | 0.3   | 0.5   | 0.1   | 0.737          | 0.664        |
| 0.1     | 0.1   | 0.7   | 0.1   | 0.736          | 0.665        |
| 0.2     | 0.1   | 0.6   | 0.1   | 0.722          | 0.666        |
| 0.3     | 0.3   | 0.2   | 0.2   | 0.743          | 0.666        |
| 0.1     | 0.3   | 0.2   | 0.4   | 0.753          | 0.667        |
| 0.1     | 0.5   | 0.3   | 0.1   | 0.742          | 0.668        |
| 0.5     | 0.2   | 0.1   | 0.2   | 0.732          | 0.668        |
| 0.2     | 0.4   | 0.3   | 0.1   | 0.721          | 0.669        |

|            |            |            |            |              |              |
|------------|------------|------------|------------|--------------|--------------|
| 0.4        | 0.2        | 0.2        | 0.2        | 0.758        | 0.670        |
| 0.2        | 0.5        | 0.2        | 0.1        | 0.756        | 0.670        |
| 0.1        | 0.6        | 0.2        | 0.1        | 0.744        | 0.671        |
| 0.7        | 0.1        | 0.1        | 0.1        | 0.730        | 0.671        |
| 0.1        | 0.1        | 0.1        | 0.7        | 0.735        | 0.672        |
| 0.2        | 0.2        | 0.1        | 0.5        | 0.761        | 0.672        |
| 0.3        | 0.2        | 0.3        | 0.2        | 0.716        | 0.672        |
| 0.3        | 0.1        | 0.2        | 0.4        | 0.717        | 0.672        |
| 0.1        | 0.2        | 0.5        | 0.2        | 0.767        | 0.673        |
| 0.5        | 0.3        | 0.1        | 0.1        | 0.728        | 0.673        |
| 0.1        | 0.1        | 0.5        | 0.3        | 0.737        | 0.675        |
| 0.3        | 0.1        | 0.3        | 0.3        | 0.727        | 0.675        |
| 0.2        | 0.4        | 0.2        | 0.2        | 0.740        | 0.676        |
| 0.2        | 0.2        | 0.2        | 0.4        | 0.748        | 0.677        |
| 0.2        | 0.3        | 0.1        | 0.4        | 0.733        | 0.677        |
| 0.3        | 0.1        | 0.1        | 0.5        | 0.739        | 0.679        |
| 0.2        | 0.1        | 0.2        | 0.5        | 0.759        | 0.680        |
| 0.1        | 0.5        | 0.2        | 0.2        | 0.745        | 0.682        |
| 0.5        | 0.2        | 0.2        | 0.1        | 0.742        | 0.683        |
| 0.1        | 0.2        | 0.2        | 0.5        | 0.741        | 0.683        |
| 0.1        | 0.1        | 0.4        | 0.4        | 0.756        | 0.685        |
| 0.6        | 0.2        | 0.1        | 0.1        | 0.741        | 0.685        |
| 0.3        | 0.1        | 0.4        | 0.2        | 0.779        | 0.685        |
| 0.2        | 0.1        | 0.1        | 0.6        | 0.768        | 0.686        |
| 0.4        | 0.3        | 0.2        | 0.1        | 0.747        | 0.688        |
| 0.2        | 0.2        | 0.3        | 0.3        | 0.745        | 0.688        |
| 0.1        | 0.2        | 0.1        | 0.6        | 0.747        | 0.689        |
| 0.4        | 0.1        | 0.1        | 0.4        | 0.758        | 0.690        |
| 0.6        | 0.1        | 0.1        | 0.2        | 0.711        | 0.691        |
| 0.4        | 0.2        | 0.3        | 0.1        | 0.761        | 0.691        |
| 0.3        | 0.2        | 0.2        | 0.3        | 0.763        | 0.693        |
| 0.3        | 0.3        | 0.1        | 0.3        | 0.793        | 0.693        |
| 0.4        | 0.1        | 0.2        | 0.3        | 0.743        | 0.695        |
| 0.2        | 0.1        | 0.4        | 0.3        | 0.773        | 0.701        |
| 0.5        | 0.1        | 0.2        | 0.2        | 0.769        | 0.706        |
| 0.2        | 0.4        | 0.1        | 0.3        | 0.770        | 0.708        |
| 0.2        | 0.3        | 0.2        | 0.3        | 0.756        | 0.711        |
| <b>0.1</b> | <b>0.3</b> | <b>0.3</b> | <b>0.3</b> | <b>0.809</b> | <b>0.723</b> |
