# Supplementary material for: Discovering Genetic Interactions in Large-Scale Association Studies by Stage-wise Likelihood Ratio Tests
Source: PubMed Central journal article supplement (PMC4581725; doi:10.1371/journal.pgen.1005502), 2015-09-24
Supplement: pgen.1005502.s018.pdf [file pgen.1005502.s018.pdf]

| Effect level | $p_{00}$ | $p_{01}$ | $p_{02}$ | $p_{10}$ | $p_{11}$ | $p_{12}$ | $p_{20}$ | $p_{21}$ | $p_{22}$ |
|--------------|----------|----------|----------|----------|----------|----------|----------|----------|----------|
| 0            | 0.1000   | 0.1000   | 0.1000   | 0.1000   | 0.1500   | 0.1500   | 0.1000   | 0.1500   | 0.1500   |
| 1            | 0.1000   | 0.1000   | 0.1000   | 0.1000   | 0.1700   | 0.1700   | 0.1000   | 0.1700   | 0.1700   |
| 2            | 0.1000   | 0.1000   | 0.1000   | 0.1000   | 0.1900   | 0.1900   | 0.1000   | 0.1900   | 0.1900   |
| 3            | 0.1000   | 0.1000   | 0.1000   | 0.1000   | 0.2100   | 0.2100   | 0.1000   | 0.2100   | 0.2100   |
