# Supplementary material for: Discovering Genetic Interactions in Large-Scale Association Studies by Stage-wise Likelihood Ratio Tests
Source: PubMed Central journal article supplement (PMC4581725; doi:10.1371/journal.pgen.1005502), 2015-09-24
Supplement: pgen.1005502.s019.pdf [file pgen.1005502.s019.pdf]

| <b>Model</b>     | Link           | $\alpha$ | $\beta_1$ | $\beta_2$ | $\gamma_1$ | $\gamma_2$ |
|------------------|----------------|----------|-----------|-----------|------------|------------|
| No association   | Logit          | -2.19    | 0         | 0         | 0          | 0          |
| Single           | Logit          | -2.19    | 0.46      | 0.46      | 0          | 0          |
| Double:identity  | Identity       | 0.1      | 0.2       | 0.2       | 0.2        | 0.2        |
| Double:log       | Log            | -2.3     | 0.4       | 0.4       | 0.4        | 0.4        |
| Double:odds      | Odds           | 0.1      | 0.3       | 0.3       | 0.3        | 0.3        |
| Double:logit     | Logit          | -2.19    | 0.5       | 0.5       | 0.5        | 0.5        |
| Double:log-compl | Log-complement | -0.1     | -0.1      | -0.1      | -0.1       | -0.1       |
